# Supplementary material for: The λ Red Proteins Promote Efficient Recombination between Diverged Sequences: Implications for Bacteriophage Genome Mosaicism
Source: PLoS Genet. 2008 May 2;4(5):e1000065. doi: 10.1371/journal.pgen.1000065 (PMC2327257; doi:10.1371/journal.pgen.1000065)
Supplement: Table S3 — Position of the mosaics detected among lactic acid bacteria bacteriophages. (0.04 MB DOC) [file pgen.1000065.s006.xls]

## Sheet: detailLL
						left	%id	right	%id
G1	G2	beg G1	beg G2	hit length	%id hit	shoulder	left	shoulder	right
						length	shoulder	length	length
Lltuc2009	LlbIL170	34550	7154	227	93.63	300	67	700	75
Lltuc2009	LlbIL285	38048	35239	614	99.59	0	0	100	74
Lltuc2009	LlbIL285	3585	3687	2124	99.55
Lltuc2009	LlbIL285	7859	7961	376	99.87
Lltuc2009	LlbIL285	9349	8703	192	95.84
Lltuc2009	LlbIL285	9745	9285	169	96.46
Lltuc2009	LlbIL285	10081	9909	381	97.25
Lltuc2009	LlbIL285	11402	11475	100	91.09
Lltuc2009	LlbIL285	11750	11850	220	96.37
Lltuc2009	LlbIL285	30343	28950	884	94.3	0	0	100	62
Lltuc2009	LlbIL285	33998	33692	120	97.1
Lltuc2009	LlbIL285	38051	35233	122	93.06	0	0	100	80
Lltuc2009	LlbIL286	3484	4034	253	94.88	300	66
Lltuc2009	LlbIL286	4328	4838	517	98.65
Lltuc2009	LlbIL286	9745	10332	169	91.15
Lltuc2009	LlbIL286	10081	10980	366	98.09
Lltuc2009	LlbIL286	11750	13512	219	96.36	0	0	200	65
Lltuc2009	LlbIL286	12694	15880	110	94.57	100	63	400	64
Lltuc2009	LlbIL286	33998	38152	503	94.64	0	0	100	68
Lltuc2009	LlbIL309	1885	1976	325	94.02
Lltuc2009	LlbIL309	11402	11333	100	91.09
Lltuc2009	LlbIL309	11750	11708	210	97.16
Lltuc2009	LlbIL309	12648	15547	129	93.05	0	0	400	65
Lltuc2009	Llbk5T	1	25818	614	99.27	0	0	200	64
Lltuc2009	Llbk5T	1880	27964	312	97.44
Lltuc2009	Llbk5T	3995	30638	332	98.05
Lltuc2009	Llbk5T	9360	35338	361	97.65
Lltuc2009	Llbk5T	11967	36193	111	99.11
Lltuc2009	Llbk5T	33998	22141	107	93.49
Lltuc2009	Llbk5T	38071	25542	112	94.67
Lltuc2009	LlTP901-1	3585	3957	203	94.59
Lltuc2009	LlTP901-1	5885	5534	533	95.41	0	0	200	58
Lltuc2009	LlTP901-1	11750	10064	223	96.2
Lltuc2009	LlTP901-1	12648	12489	133	92.51	0	0	400	64
Lltuc2009	LlTP901-1	15271	14151	579	95.69	200	63	1300	69
Lltuc2009	LlTP901-1	17822	16694	477	95.08	1400	70
Lltuc2009	LlTP901-1	19269	18650	470	97.56
Lltuc2009	LlTP901-1	21531	19597	733	97.07	0	0	300	65
Lltuc2009	LlTP901-1	23307	21385	360	95.84	200	72
Lltuc2009	LlTP901-1	24039	22129	1448	96.96	0	0	100	63
Lltuc2009	LlTP901-1	27341	25166	1636	94.69
Lltuc2009	LlTP901-1	30655	28516	746	96.05	0	0	200	68
Lltuc2009	LlTP901-1	33999	30896	502	95.73
Lltuc2009	LlTP901-1	35111	31939	225	90.49
Lltuc2009	LlTP901-1	36002	32872	926	94.4	100	61
Lltuc2009	Llr1t	37848	32851	906	98.51
Lltuc2009	Llr1t	1874	1874	331	96.38
Lltuc2009	Llr1t	3981	4036	168	97.63
Lltuc2009	Llr1t	9360	8710	186	97.59
Lltuc2009	Llr1t	9736	9272	559	96.61
Lltuc2009	Llr1t	11770	11057	292	96.76	200	58	100	62
Lltuc2009	Llr1t	34236	29776	384	95.71	0	0	600	75
Lltuc2009	Llr1t	37854	32857	219	97.95
LlbIL170	LlbIL286	7175	38724	257	92.04	300	65
LlbIL170	LlTP901-1	7154	31447	471	91.74	300	67
LlbIL170	LlTP901-1	8505	32840	147	90.2	0	0	100	62
LlbIL170	Llr1t	7154	30090	471	91.95	300	68
LlbIL170	Llsk1	108	117	2487	93.25	200	78
LlbIL170	Llsk1	5103	5112	846	95.87
LlbIL170	Llsk1	8840	6820	454	94.62
LlbIL170	Llsk1	9749	7746	390	95.27	0	0	1200	73
LlbIL170	Llsk1	12533	10776	810	90.99	0	0	100	65
LlbIL170	Llsk1	18439	15954	142	91.23
LlbIL170	Llsk1	19266	16245	270	91.7	0	0	300	72
LlbIL170	Llsk1	21837	18221	247	93.13
LlbIL170	Llsk1	23755	19371	421	92.53	100	63
LlbIL170	Llsk1	24621	20237	170	92.4
LlbIL170	Llsk1	25017	20633	254	94.5
LlbIL170	Llsk1	26108	21827	218	92.91	100	67	400	67
LlbIL170	Llsk1	26877	22603	109	90.41	300	62
LlbIL170	Llsk1	27384	23083	474	92.95
LlbIL170	Llsk1	28398	24382	112	95.13
LlbIL170	Llsk1	29847	26167	435	94.5
LlbIL170	Llsk1	30774	27095	200	91.32	0	0	300	68
LlbIL285	LlbIL286	3687	4135	203	94.1
LlbIL285	LlbIL286	4436	4844	514	98.93
LlbIL285	LlbIL286	9160	10207	247	94.14
LlbIL285	LlbIL286	9669	10740	196	99.49
LlbIL285	LlbIL286	10090	11161	216	98.39
LlbIL285	LlbIL286	11844	13506	224	96.22
LlbIL285	LlbIL286	12293	9841	175	94.87
LlbIL285	LlbIL286	33684	38144	124	96.39
LlbIL285	LlbIL286	34095	40154	622	93.5
LlbIL285	LlbIL309	10581	10439	202	99.51	100	59
LlbIL285	LlbIL309	11013	10871	638	99.61
LlbIL285	LlbIL309	13129	12415	112	96.9
LlbIL285	LlbIL309	14534	13743	187	98.67	100	58
LlbIL285	LlbIL309	34437	35599	142	96.85	600	84
LlbIL285	Llbk5T	35339	25618	665	98.95	200	78
LlbIL285	Llbk5T	4097	30638	332	97.45
LlbIL285	Llbk5T	8703	35327	192	97.92
LlbIL285	Llbk5T	9282	35720	171	95.93
LlbIL285	Llbk5T	12067	36193	111	97.77
LlbIL285	Llbk5T	13339	37583	209	96.43	100	58
LlbIL285	Llbk5T	14899	38589	301	97.84
LlbIL285	Llbk5T	33687	22136	661	92.24
LlbIL285	LlTP901-1	1339	1606	794	97.93	200	65
LlbIL285	LlTP901-1	2942	3212	575	97.31
LlbIL285	LlTP901-1	5987	5534	533	95.6	0	0	200	58
LlbIL285	LlTP901-1	11847	10061	224	98.44
LlbIL285	LlTP901-1	14552	11878	178	93.56	100	60
LlbIL285	LlTP901-1	28950	28168	135	98.9
LlbIL285	LlTP901-1	29243	28494	737	95.13
LlbIL285	LlTP901-1	33693	30896	119	97.08
LlbIL285	Llr1t	35239	33051	614	97.72	0	0	100	74
LlbIL285	Llr1t	4083	4036	168	97.63
LlbIL285	Llr1t	8706	8702	459	96.3
LlbIL285	Llr1t	9990	9698	213	98.36	0	0	100	72
LlbIL285	Llr1t	11870	11057	213	98.59	500	59
LlbIL286	LlbIL309	8360	8387	559	95.08	100	63
LlbIL286	LlbIL309	13506	11702	220	95.92
LlbIL286	LlbIL309	14632	12602	109	94.59
LlbIL286	LlbIL309	14942	12902	127	94.92
LlbIL286	LlbIL309	15843	15556	355	94.94	100	58
LlbIL286	LlbIL309	17579	17051	114	95.65	300	62
LlbIL286	LlbIL309	30395	28132	203	92.89
LlbIL286	LlbIL309	30942	28679	1195	97.33	100	59	100	63
LlbIL286	LlbIL309	33447	31184	213	97.43	100	63	300	81
LlbIL286	LlbIL309	37311	33866	430	93.26
LlbIL286	LlbIL309	40156	35188	465	91.19	200	65
LlbIL286	LlbIL309	41096	36199	301	94.54
LlbIL286	Llbk5T	4838	30971	166	95.8
LlbIL286	Llbk5T	10329	35720	171	90.7
LlbIL286	Llbk5T	13729	36193	110	97.75
LlbIL286	Llbk5T	17353	1	1965	98.98	600	78	200	69
LlbIL286	Llbk5T	21479	4133	846	97.34	100	69
LlbIL286	Llbk5T	23225	5859	1446	96.96
LlbIL286	Llbk5T	26153	9367	431	95.13	0	0	600	69
LlbIL286	Llbk5T	27915	11336	140	93.95	200	66
LlbIL286	Llbk5T	28211	11632	591	93.33
LlbIL286	Llbk5T	29453	12868	709	90.35
LlbIL286	Llbk5T	35788	17706	464	90.74	0	0	200	68
LlbIL286	Llbk5T	38150	22139	117	93.62
LlbIL286	Llbk5T	40154	22547	457	92.58
LlbIL286	LlTP901-1	4135	3957	206	96.62
LlbIL286	LlTP901-1	5778	5047	195	91.3	0	0	200	62
LlbIL286	LlTP901-1	13509	10061	220	95.93
LlbIL286	LlTP901-1	15869	12524	286	95.64	100	60
LlbIL286	LlTP901-1	38153	30896	542	95.49
LlbIL286	Llr1t	10207	9156	232	93.33
LlbIL286	Llr1t	11061	9698	213	99.07	0	0	100	60
LlbIL286	Llr1t	13532	11057	209	95.94	0	0	200	67
LlbIL286	Llr1t	38390	29776	424	94.24
LlbIL309	Llbk5T	1976	27969	312	94.72
LlbIL309	Llbk5T	2923	29013	174	96.56
LlbIL309	Llbk5T	11925	36193	170	96.49	0	0	200	58
LlbIL309	Llbk5T	17051	227	114	94.35	200	63
LlbIL309	Llbk5T	28126	13804	216	91.94	0	0	100	58
LlbIL309	Llbk5T	32579	19229	139	91.07	0	0	100	62
LlbIL309	Llbk5T	32579	19697	139	91.07	0	0	100	62
LlbIL309	Llbk5T	32579	20165	139	91.07	0	0	100	62
LlbIL309	Llbk5T	32579	20633	139	91.07	0	0	100	63
LlbIL309	Llbk5T	35022	22383	539	91.76
LlbIL309	LlTP901-1	5600	4881	134	96.28
LlbIL309	LlTP901-1	11705	10061	221	97.52
LlbIL309	LlTP901-1	13761	11878	186	93.32	100	67
LlbIL309	LlTP901-1	15553	12495	317	96.07
LlbIL309	Llr1t	1976	1885	539	95.92
LlbIL309	Llr1t	4015	2972	144	98.96
LlbIL309	Llr1t	7447	6666	104	92.89
LlbIL309	Llr1t	11728	11057	210	97.62	500	59
Llbk5T	LlTP901-1	22142	30896	115	93.53
Llbk5T	LlTP901-1	35024	7455	160	95.65
Llbk5T	LlTP901-1	36193	10281	111	97.32
Llbk5T	LlTP901-1	38324	12224	146	95.92	0	0	100	62
Llbk5T	Llr1t	25518	33051	614	97.4	0	0	100	71
Llbk5T	Llr1t	27964	1880	314	96.51
Llbk5T	Llr1t	29805	3221	578	97.84
Llbk5T	Llr1t	35332	8704	189	98.95
Llbk5T	Llr1t	35714	9272	174	95.13
Llbk5T	Llr1t	36193	11254	111	97.32
Llbk5T	Llr1t	38324	13034	131	95.45
LlTP901-1	Llr1t	4627	4385	212	97.89	0	0	100	65
LlTP901-1	Llr1t	9246	10407	137	98.55	0	0	200	59
LlTP901-1	Llr1t	10084	11057	212	98.83
LlTP901-1	Llr1t	12224	13034	131	96.21	0	0	100	61
LlTP901-1	Llr1t	31133	29776	1018	95.09
Llsfi21	Llsfi19	7804	9388	685	90.89	2000	81
Llsfi21	Llsfi19	9269	10854	410	93.42	0	0	300	71
Llsfi21	Llsfi19	10499	12147	113	92.51
Llsfi21	Llsfi19	12883	14666	2054	97.47	2000	78
Llsfi21	Llsfi19	16994	18822	1847	98.86
Llsfi21	Llsfi19	20736	22606	886	99.77	0	0	100	70
Llsfi21	Llsfi19	29160	27932	1274	99.57
Llsfi21	Llsfi19	31722	30494	1437	99.48
Llsfi21	Llsfi19	34663	33435	687	99.64
Llsfi21	Llsfi19	36622	35317	328	95.89
Llsfi21	Llsfi19	37389	36072	202	98.77	0	0	200	66
Llsfi21	Ll7201	20883	33458	284	91.81	2000	79	1200	78
Llsfi21	Ll7201	36394	7490	185	91.13	0	0	1200	68
Llsfi19	Ll7201	37097	9536	370	91.8
Llsfi19	Ll7201	4577	14323	1882	91.06
Llsfi19	Ll7201	22753	33458	284	91.81
